# Supplementary material
Source: publisher figshare collection journal article supplement (https://frontiersin.figshare.com/ndownloader/files/22052838)
Supplement: Supplementary file 1 [file 22052838]

Supplemental Table 3. Summary areas for the 1997 versus the 2010 LULC map datasets and other metrics describing change in LULC summary class areas.

| **LULC Class** | **1997 Code** | **2010 Code** | **1997 Area (km2)** | **1997 % Total** | **2010 Area (km2)** | **% 2010 Total** | **Change in Area (km2) (2010 vs. 1997)** | **Change in % Total Area (2010 vs. 1997)** | **Area Ratio (2010 vs. 1997)** |
| --- | --- | --- | --- | --- | --- | --- | --- | --- | --- |
| Barren | 10 | 1 | 2,231 | 0.49% | 1,823 | 0.40% | -409 | -0.1% | 0.8 |
| Urban/Developed | 20 | 2 | 379 | 0.08% | 1,943 | 0.42% | 1,564 | 0.3% | 5.1 |
| Permanent Crops | 30 | 3 | 165,468 | 36.66% | 157,496 | 34.16% | -7,972 | -2.5% | 1.0 |
| Shifting Cultivation | 40 | 4 | 24,646 | 5.46% | 19,293 | 4.19% | -5,353 | -1.3% | 0.8 |
| Scrub/Shrub/Herbaceous | 50 | 5 | 8,526 | 1.89% | 39,435 | 8.55% | 30,909 | 6.7% | 4.6 |
| Deciduous Forest/Scrub | 60 | 6 | 46,341 | 10.27% | 81,005 | 17.57% | 34,664 | 7.3% | 1.7 |
| Evergreen Forest | 70 | 7 | 203,151 | 45.01% | 157,654 | 34.20% | -45,497 | -10.8% | 0.8 |
| Industrial Forest Plantation | 80 | 8 | 628 | 0.14% | 1,978 | 0.43% | 1,349 | 0.3% | 3.1 |
| Wetland Cover | 90 | 9 | 23 | 0.01% | 363 | 0.08% | 340 | 0.1% | 15.8 |
| Total | N/A | N/A | 451,393 | 100.00% | 460,989 | 100.00% | N/A | N/A | N/A |
